# Supplementary material for: Ultrasensitive detection of flap endonuclease 1 using a chemiluminescence optical fiber biosensor with hybridization chain reaction
Source: Royal Society of Chemistry journal article supplement (doi:10.1039/d3sd00230f), 2023-11-22
Supplement: d3sd00230f1.pdf [file d3sd00230f1.pdf]

## **Supplementary Materials**

# **Ultrasensitive detection of flap endonuclease 1 using a chemiluminescence optical fiber biosensor with hybridization chain reaction**

**Jinlan Yang<sup>1</sup>, Yile Qin<sup>1</sup>, Dingsong Li<sup>1</sup>, Yaxue Jia<sup>1</sup>, Jiahui Fu<sup>2\*</sup> and Li  
Yang<sup>1\*</sup>**

<sup>1</sup> Department of Chemistry, Northeast Normal University, 5268 Renmin Street,  
Changchun, Jilin Province, 130024, China

<sup>2</sup> The First Hospital of Jilin University, Changchun, Jilin Province, China

\*Corresponding author:

L. Yang, yangl330@nenu.edu.cn, Tel: +86-431-85099762, Fax: +86-431-85099762,  
Jiahui Fu, 18343160896@163.com

## **Table of contents**

1. Pretreatment of optical fiber
2. Table S1 Sequences of DNAs used in the present study
3. Table S2 Comparison of different methods for FEN1 determination
4. Fig. S1
5. Fig. S2

### Pretreatment of optical fiber

4 cm bare fiber (SFS400/440/700 T, numerical aperture 0.22. Wyoptics Technology Co., Ltd., Shanghai, China) was used to construct sensor in the assay. First, the distal end of optical fiber (about 1.5 cm) was immersed into chloroform solution for 10 min and then in 24% HF for 20 min to remove the acrylic sheath and silica cladding. After rinsing with 0.1 M HCl to get rid of impurities, the fiber was inserted in 0.1 M NaOH for 1 h to activate the silanol group on the surface. The obtained bare core of the optical fiber was washed with ultrapure water and dried by nitrogen gas.

**Table S1 Sequences of DNAs used in the present study.**

| Name           | Sequence (from 5' to 3')                     |
|----------------|----------------------------------------------|
| CP             | COOH-TCACACCATGTCCTCCAGCAATTTGGAGTGACATG     |
| H <sub>1</sub> | TGGAGTGACATGGTGTGACATGTCCTCCAAATTGC-biotin   |
| H <sub>2</sub> | biotin-TCACACCATGTCCTCCAGCAATTTGGAGTGACATG   |
| 5' flap        | TGGAGTGACATGGTGTGA                           |
| T              | CCCCACTCGCTGCAATCACTGAACGTTACTAGAT           |
| D              | TGGAGTGACATGGTGTGAGTGATTGCAGCGAGTGGGG-biotin |
| U              | ATCTAGTAACGTTTCAT                            |

**Table S2 Comparison of different methods for FEN1 determination.**

| Method                                                | Detection system                                                           | LOD                                     | Linear range                                                                   | Ref       |
|-------------------------------------------------------|----------------------------------------------------------------------------|-----------------------------------------|--------------------------------------------------------------------------------|-----------|
| Reverse transcription<br>polymerase chain reaction    |                                                                            | semiquantitative                        |                                                                                | 1         |
| Western blot                                          |                                                                            | qualitative                             |                                                                                | 2         |
| Immunohistochemistry                                  |                                                                            | qualitative                             |                                                                                | 3         |
| Fluorescence method                                   | DNA-Ag nanoclusters sensor                                                 | 10 pM                                   | 20–1000 pM                                                                     | 4         |
| Enzyme-assisted rolling<br>circle amplification       | Dumbbell DNA-SYBR green I<br>fluorescence sensor                           | 15 fM                                   | 20–8000 fM                                                                     | 5         |
| Nt.BstNBI-induced tandem<br>signal amplification*     | G-quadruplex-thioflavin T<br>fluorescence sensor                           | 0.002-3.6 fmol<br>(0.001–1.5 U)         | 1.68 amol<br>(0.75 mU)                                                         | 6         |
| Enzyme-assisted exponential<br>amplification reaction | DNA-SYBR green I fluorescence<br>sensor                                    | 0.5 fM                                  | 1 fM–10 pM                                                                     | 7         |
| Enzyme-free branched*<br>hybridization chain reaction | DNA-Ru(phen) <sub>3</sub> <sup>2+</sup><br>electrochemiluminescence sensor | 0.052 fM<br>( $2.2 \times 10^{-2}$ U/L) | 0.16–1.4×10 <sup>4</sup> fM<br>( $6.5 \times 10^{-2}$ – $6.5 \times 10^3$ U/L) | 8         |
| Enzyme-free Hybridization<br>chain reaction           | Chemiluminescent optical fiber<br>sensors                                  | 3.4 fM                                  | 10 fM–74 pM                                                                    | This work |

\*The unit of FEN1 was unified molar concentration according the conversion formula of 1 U/L = 2.4 fM which is obtained by New England Biolabs Inc.

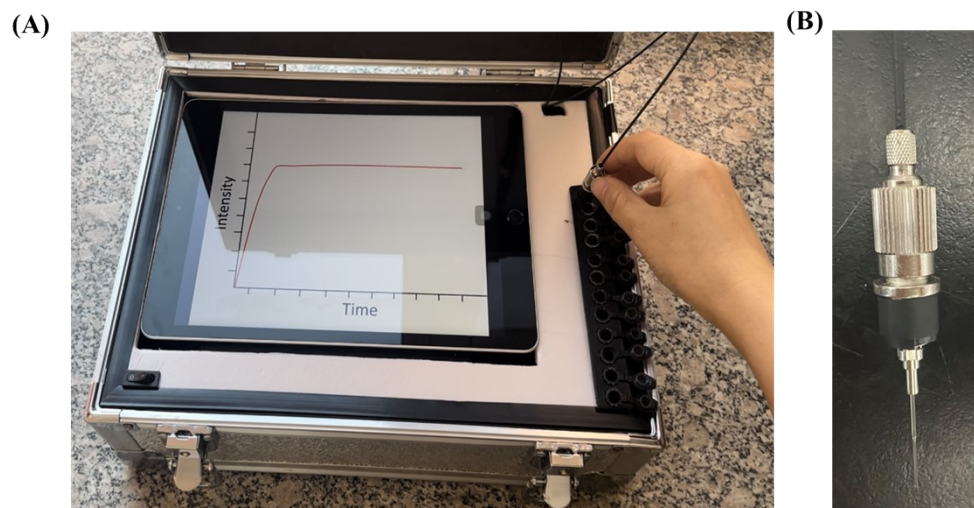

Fig. S1 The picture of the biosensor system (A) and optical fiber sensing unit (B).

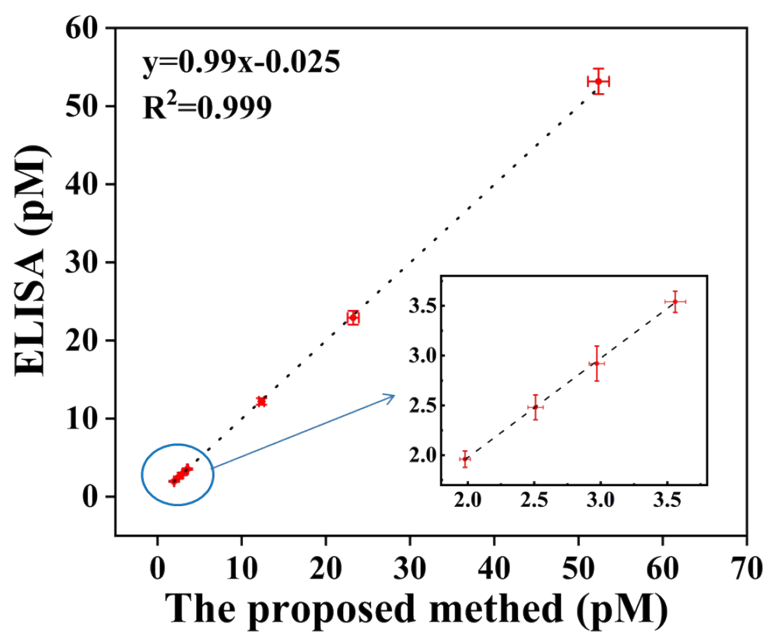

Fig. S2. Correlation between the proposed method and ELISA (n=5). The data shows 95% confidence interval of the mean.

## Reference

1. K. Wang, C. Xie and D. Chen, *Int. J. Mol. Med.*, 2014, **33**, 1268-1274.
2. T. Nikolova, M. Christmann and B. Kaina, *Anticancer Research*, 2009, **29**, 2453-2460.
3. L. He, Y. Zhang, H. Sun, F. Jiang, H. Yang, H. Wu, T. Zhou, S. Hu, C. S. Kathera, X. Wang, H. Chen, H. Li, B. Shen, Y. Zhu and Z. Guo, *EBioMedicine*, 2016, **14**, 32-43.
4. B. Li, P. Zhang, B. Zhou, S. Xie, A. Xia, T. Suo, S. Feng and X. Zhang, *Anal. Chim. Acta.*, 2021, **1148**, 238194.
5. B. Li, A. Xia, S. Xie, L. Lin, Z. Ji, T. Suo, X. Zhang and H. Huang, *Anal. Chem.*, 2021, **93**, 3287-3294.
6. H. Yang, C. Wang, E. Xu, W. Wei, Y. Liu and S. Liu, *Anal. Chem.*, 2021, **93**, 6567-6572.
7. B. Zhou, L. Lin and B. Li, *Sens. Actuators B*, 2021, **346**, 130457.
8. X. Li, Y. Huang, J. Chen, S. Zhuo, Z. Lin and J. Chen, *Bioelectrochemistry*, 2022, **147**, 108189.
